# Supplementary material for: Species differences and molecular determinant of TRPA1 cold sensitivity
Source: Nat Commun. 2013 Sep 27;4:2501. doi: 10.1038/ncomms3501 (PMC3791479; doi:10.1038/ncomms3501)
Supplement: Supplementary Information — Supplementary Figures S1-S8 [file ncomms3501-s1.pdf]

## Supplementary Figure S1

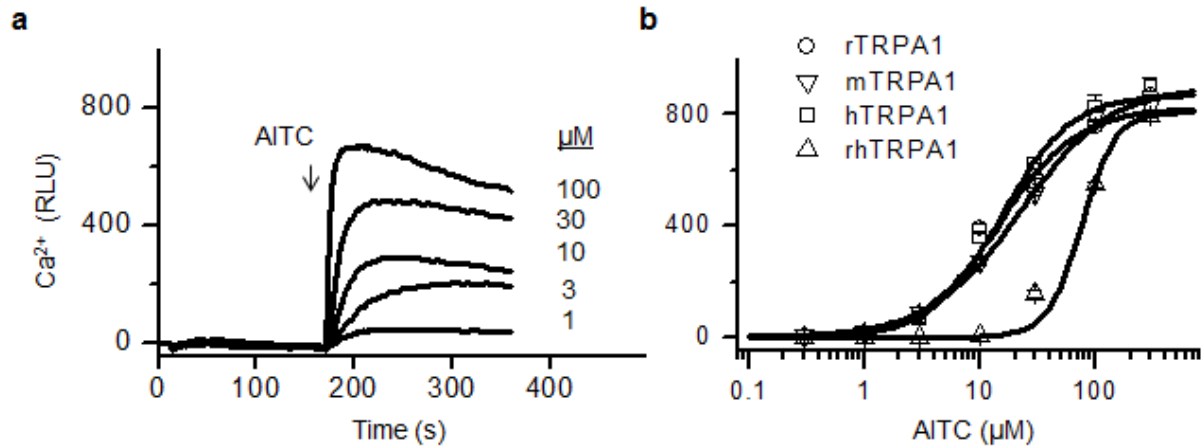

Supplementary Figure S1. AITC responses of TRPA1 species variants in  $\text{Ca}^{2+}$  assay. **(a)** AITC evoked increase of intracellular  $\text{Ca}^{2+}$  in HEK293-F cells expressing rTRPA1 in a concentration-dependent manner, as reflected by increases of relative light units (RLU, Left). **(b)** Concentration dose-responses of AITC activation. EC<sub>50</sub> of AITC was  $15.3 \pm 1.1$ ,  $22.2 \pm 1.8$ ,  $14.9 \pm 0.9$  and  $75.5 \pm 2.7$   $\mu\text{M}$  for r-, m-, h- and rh-TRPA1, respectively. Note that the maximal responses were comparable among the four channel types. n = 8. Error bars are s.d.

## Supplementary Figure S2

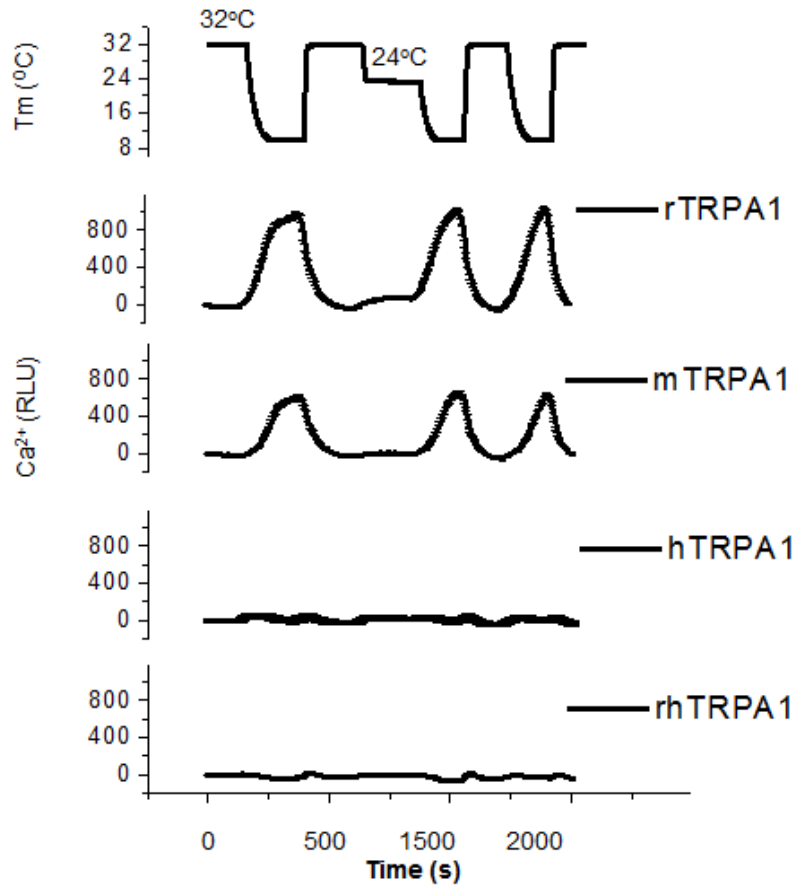

Supplementary Figure S2. Difference in cold responses between rodent and primate TRPA1. The cold-evoked Ca<sup>2+</sup> responses in r- and mTRPA1 were reversible and independent of holding temperature (32 or 24°C). Cold did not elicit Ca<sup>2+</sup> responses in h- and rhTRPA1. n = 12

### Supplementary Figure S3

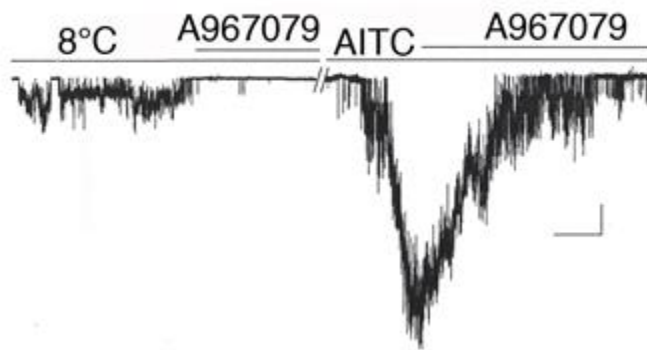

Supplementary Figure S3. rTRPA1 activities were blocked by 5  $\mu$ M A967079. Cold- and AITC-evoked single channel activities were blocked by A967079 (-60 mV), indicating TRPA1-specific conductance. The scale bars are 5 pA and 20 s respectively.

## Supplementary Figure S4

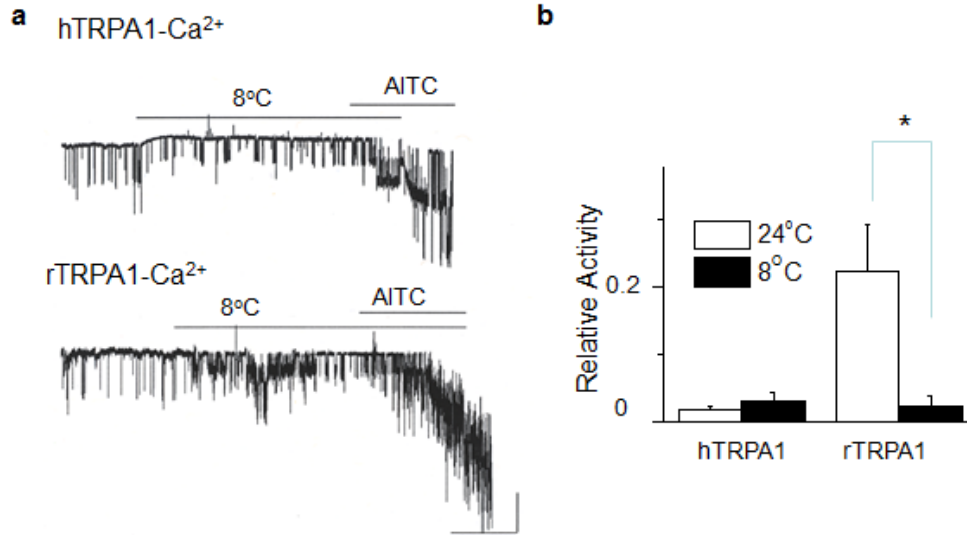

Supplementary Figure S4. Single channel activities of h- and rTRPA1 in 1 mM external  $\text{Ca}^{2+}$ . (a) Single channel traces at -60 mV. Scale bars are 5 pA and 10 s. (b) Relative activity of h- and rTRPA1 at 8°C and 24°C. Relative channel activity was determined by normalizing NPo against AITC response. Error bars are s.d.  $n = 4$ . \* indicates  $p < 0.05$  from student's t-test.

### Supplementary Figure S5

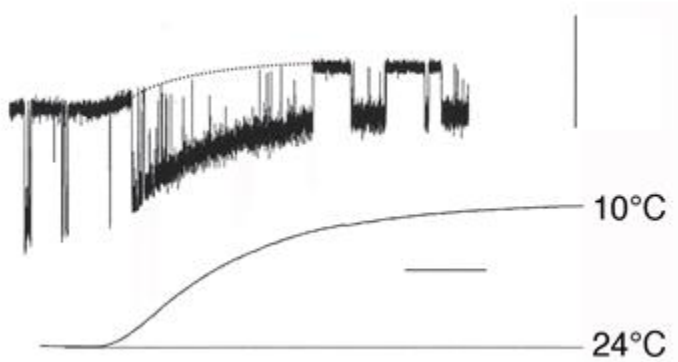

Supplementary Figure S5. Effects of temperature on rTRPA1 conductance. Cooling reduced unitary conductance in a progressive, but not a step-wise pattern. Scale bars are 5 pA and 2 s.

## Supplementary Figure S6

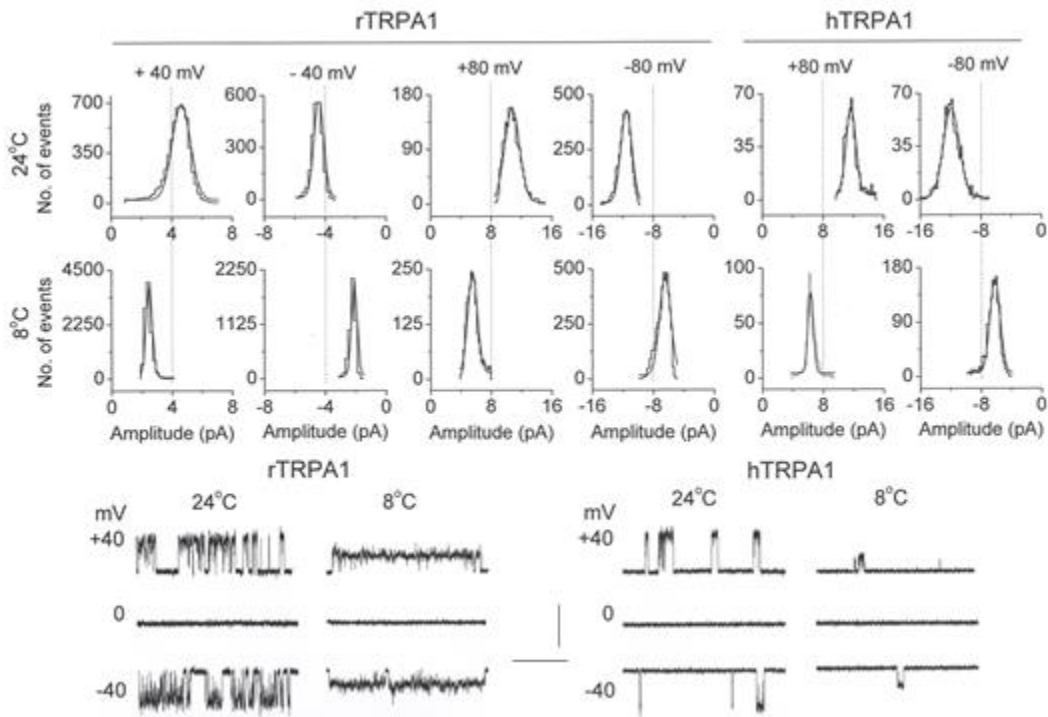

Supplementary Figure S6. Amplitude histograms of single channel openings of r- and hTRPA1 at 24°C and 8°C. A  $K^+$ -based perfusion and pipette solution was used, containing: 150 mM KCl, 1 mM  $MgCl_2$ , and 11 mM glucose. (pH7.3). Cell-attached patches were formed on HEK-293F cells expressing rTRPA1 or hTRPA1, and single channel openings were recorded at various membrane potentials. Representative amplitude histograms are shown. Current reversed at  $\sim 0$  mV. At -40 mV, the single channel conductance for rTRPA1 were 71 pS and 21 pS at 24°C and 8°C, respectively. Scale bars are 3 pA and 100 ms. n = 4-5.

### Supplementary Figure S7

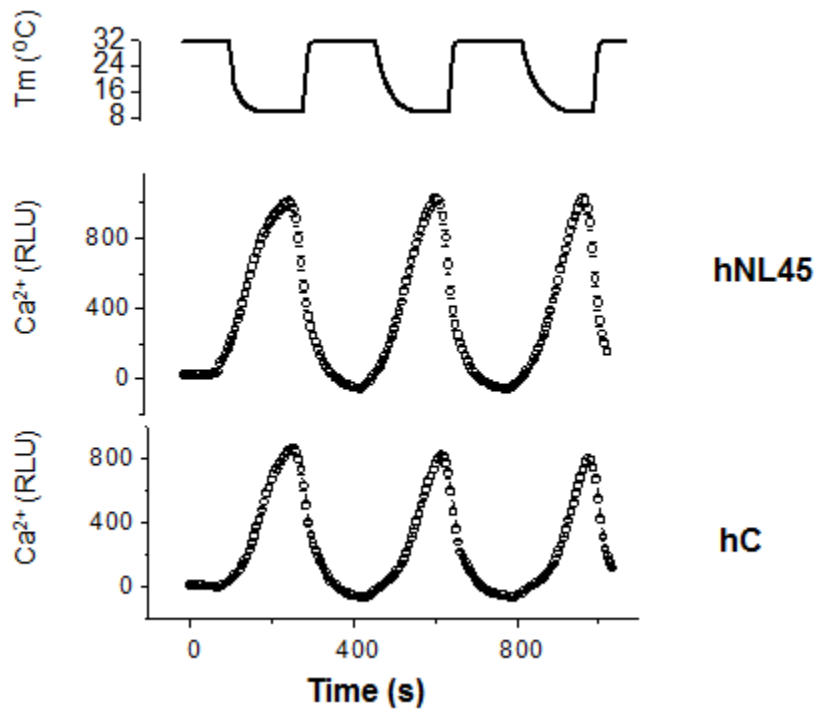

Supplementary Figure S7. On the rTRPA1 background, introducing N terminus through L45 linker [h(N-45)] or C-terminus of hTRPA1 (hC) retained cold activation. Fluorescence traces are shown as mean  $\pm$  SD from 12 wells.

### Supplementary Figure S8

|         |       |            |           |                 |                           |
|---------|-------|------------|-----------|-----------------|---------------------------|
| rTRPA1  | (868) | VIFKTLLRST | <b>G</b>  | VFIFLLLAFLGLSFY | } cold-sensitive          |
| mTRPA1  | (868) | VIFKTLLRST | <b>G</b>  | VFIFLLLAFLGLSFY |                           |
| rsTRPA1 | (865) | EILKTLIRII | <b>V</b>  | VFFFLMLAFGLSFH  | } heat-sensitive          |
| hTRPA1  | (865) | VILKTLLRST | <b>V</b>  | VFIFLLLAFLGLSFY | } temperature-insensitive |
| rhTRPA1 | (865) | VILKTLLRST | <b>V</b>  | VFIFLLLAFLGLSFY |                           |
|         |       |            | <b>S5</b> |                 |                           |

Supplementary Figure S8. Alignment of S5 domains. G878 are conserved in cold sensitive mTRPA1/rTRPA1; whereas V875 are conserved in heat-sensitive rsTRPA1 (rattlesnake) and temperature-insensitive hTRPA1/rhTRPA1.
